# Supplementary material for: AT Homopolymer Strings as a Motif for Self-Recognition and Repair of Genomes in <em>Salmonella enterica</em> Subspecies I
Source: Preprints.org preprint supplement (doi:10.20944/preprints202106.0384.v1), 2021-06-15
Supplement: Supplementary file 2 [file supplementary]

TABLE S1. List of bacterial genomes analyzed for kmer homopolymers

| Salmonella enterica subspecies I                                    | NCBI reference | Other Eubacteria genera              | NCBI reference |
|---------------------------------------------------------------------|----------------|--------------------------------------|----------------|
| Salmonella enterica subspecies I serovar Agona                      | NC_011149.1    | Bacillus anthracis Ames ancestor     | NC_007530.2    |
| Salmonella enterica subspecies I serovar Braenderup                 | CP022490.1     | Bacillus anthracis CDC684            | NC_012581.1    |
| Salmonella enterica subspecies I serovar Enteritidis ATCC BAA-708   | CP025554.1     | Bacillus anthracis Sterne            | NC_005945.1    |
| Salmonella enterica subspecies I serovar Enteritidis CDC_2010K_0968 | CP007528.1     | Bacillus cereus ATCC14579            | NC_004722.1    |
|                                                                     |                | Bacillus cereus B4264                | NC_011725.1    |
| Salmonella enterica subspecies I serovar Enteritidis CFSAN033543    | CP020825.1     | Bacillus cereus G9842                | NC_011772.1    |
| Salmonella enterica subspecies I serovar Enteritidis CFSAN051873    | CP022003.1     | Enterococcus faecalis D32            | NC_018221.1    |
| Salmonella enterica subspecies I serovar Enteritidis CFSAN076214    | CP033340.1     | Enterococcus faecalis TY1            | CP031027.1     |
| Salmonella enterica subspecies I serovar Enteritidis EC20090641     | CP007249.2     | Enterococcus faecalis V583           | NC_004668.1    |
| Salmonella enterica subspecies I serovar Enteritidis FORC_052       | CP016754.1     | Escherichia coli CFSAN029787         | CP011416.1     |
| Salmonella enterica subspecies I serovar Enteritidis OLF-SE1-1019-1 | CP009083.1     | Escherichia coli Combat2C1           | CP019243.1     |
|                                                                     |                | Escherichia coli IAI39               | NC_011750.1    |
|                                                                     |                | Escherichia coli JJ2434              | CP013835.1     |
| Salmonella enterica subspecies I serovar Enteritidis strRM2968      | CP028151.1     | Escherichia coli K-12                | NC_000913.3    |
| Salmonella enterica subspecies I serovar Gallinarum 9184            | CP019035.1     | Escherichia coli NCTC11151           | LR134031.1     |
| Salmonella enterica subspecies I serovar Heidelberg                 | NC_021812.2    | Escherichia coli Nissle 1917         | CP007799.1     |
| Salmonella enterica subspecies I serovar Infantis                   | CP019202.1     | Escherichia coli O104:H4             | NC_018658.1    |
| Salmonella enterica subspecies I serovar Javiana                    | NC_020307.1    | Escherichia coli O157:H7             | NC_002695.2    |
| Salmonella enterica subspecies I serovar Mbandaka                   | CP033343.1     | Escherichia coli O83:H1              | NC_017634.1    |
| Salmonella enterica subspecies I serovar Montevideo                 | CP029336.1     | Escherichia coli UK_Dog_Liverpool    | CP031653.1     |
| Salmonella enterica subspecies I serovar Newport                    | NC_011080.1    | Escherichia coli UMN026              | NC_011751.1    |
| Salmonella enterica subspecies I serovar Oranienburg                | CP019197.1     | Proteus mirabilis AR379              | CP029133.1     |
| Salmonella enterica subspecies I serovar Saintpaul                  | CP019206       | Proteus mirabilis HI4320             | NC_010554.1    |
| Salmonella enterica subspecies I serovar Schwarzengrund             | NC_011094.1    | Proteus mirabilis VAC                | CP042907.1     |
| Salmonella enterica subspecies I serovar Thompson                   | NC_022525.1    | Shigella sonnei 53G                  | NC_016822.1    |
|                                                                     |                | Shigella sonnei ATCC29930            | CP026802.1     |
| Salmonella enterica subspecies I serovar Typhi 311189_282186        | CP029920.1     | Shigella sonnei Ss046                | NC_007384.1    |
| Salmonella enterica subspecies I serovar Typhi 343077_214162        | CP029862.1     | Staphylococcus aureus Bmb9393        | NC_021670.1    |
|                                                                     |                | Staphylococcus aureus NCTC 8325      | NC_007795.1    |
|                                                                     |                | Staphylococcus aureus TW20           | NC_017331      |
| Salmonella enterica subspecies I serovar Typhi ERL024120            | LT905088.1     | Streptococcus pyogenes M1GAS         | NC_002737.2    |
| Salmonella enterica subspecies I serovar Typhi P-stx-12             | NC_016832.1    | Streptococcus pyogenes MGAS10270     | NC_008024.1    |
| Salmonella enterica subspecies I serovar Typhi SGB92                | LT904877.1     | Streptococcus pyogenes MGAS6180      | NC_007296.2    |
| Salmonella enterica subspecies I serovar Typhi Ty21a                | NC_021176.1    | Vibrio vulnificus CECT4999 cl        | CP014636.1     |
| Salmonella enterica subspecies I serovar Typhi ty3-243              | LT905090.1     | Vibrio vulnificus CECT4999 cII       | CP014637.1     |
| Salmonella enterica subspecies I serovar Typhi TY585                | LT904852.1     | Vibrio vulnificus Env1 cl            | CP017635.1     |
| Salmonella enterica subspecies I serovar Typhi WGS1146              | CP040575.1     | Vibrio vulnificus Env1 cII           | CP017636.1     |
| Salmonella enterica subspecies I serovar Typhimurium D23580         | NC_016854.1    | Vibrio vulnificus YJ016 cl           | NC_005139.1    |
|                                                                     |                | Vibrio vulnificus YJ016 cII          | NC_005140.1    |
| Salmonella enterica subspecies I serovar Typhimurium DT2            | NC_022544.1    | Yersinia pseudotuberculosis IP31758  | NC_009708.1    |
| Salmonella enterica subspecies I serovar Typhimurium LT2            | NC_003197.2    | Yersinia pseudotuberculosis IP32953  | NC_006155.1    |
|                                                                     |                | Yersinia pseudotuberculosis NCTC3571 | LR134306.1     |
| Salmonella enterica subspecies I serovar Typhimurium str798         | NC_017046.1    |                                      |                |
| Salmonella enterica subspecies I serovar Typhimurium strST4/74      | NC_016857.1    |                                      |                |
| Salmonella enterica subspecies I serovar Typhimurium strT000240     | NC_016860.1    |                                      |                |
| Salmonella enterica subspecies I serovar Typhimurium strU288        | NC_021151.1    |                                      |                |
| Salmonella enterica subspecies I serovar Typhimurium var5-          | NC_021814.1    |                                      |                |
| Salmonella enterica subspecies I serovar Typhimurium YU15           | CP014358.1     |                                      |                |
| Salmonella enterica subspecies I serovar Typhimurium SL1344         | NC_016810.1    |                                      |                |
| Salmonella enterica subspecies I serovar Typhimurium UK-1           | NC_016863.1    |                                      |                |
| Salmonella enterica subspecies I serovar Typhimurium DT104          | NC_022569.1    |                                      |                |
| Salmonella enterica subspecies I serovar Typhi CT18                 | NC_003198.1    |                                      |                |
| Salmonella enterica subspecies I serovar Typhi 129-0238-M           | LT904888.1     |                                      |                |
| Salmonella enterica subspecies I serovar Typhi B/SF/13/03/195       | CP012151.1     |                                      |                |
| Salmonella enterica subspecies I serovar Enteritidis strDurban      | CP007507.1     |                                      |                |
| Salmonella enterica subspecies I serovar Enteritidis P125109        | NC_011294.1    |                                      |                |
| Salmonella enterica subspecies I serovar Enteritidis CFSAN018747    | CP028196.1     |                                      |                |
